# Supplementary material
Source: publisher site journal article supplement (https://www.dovepress.com/get_supplementary_file.php?f=309818.xlsx)
Supplement: Supplementary file 1 [file get_supplementary_file.php]

## Sheet: Table S1
Table S1 FST raw data and descriptive statistic after acute administration of haloperidol, risperidon, WAY-181187 and SB-742457, given alone and in combinations.
Note: The data were evaluated using two-way analysis of variance (ANOVA), value*―outlier values excluded from statistical analysis, X - an animal terminated because of a significant deterioration of health or died during experiment
Abbreviations: veh―vehicle, halo―haloperidol, risp―risperidone, WAY―WAY-181187, SB―SB-742457, N―number of data included in the statistical analysis, SEM―number of data included in the statistical analysis standard error of the mean, -0,95%/+0,95%―lower/upper bound of 95% confidence interval
	immobility time (s)					climbing time (s)						immobility time (s)					climbing time (s)
	veh	halo	WAY	halo+WAY		veh	halo	WAY	halo+WAY			veh	halo	SB	halo+SB		veh	halo	SB	halo+SB
	X	224	121	202		X	47	117	65			170	224	134	180		112	47	102	26
	147	220	119	205		135	53	124	56			117	220	191	186		111	53	59	33
	200	200	124	104		42	57	111	126			184	200	173	191		35	57	91	48
	195	207	117	129		64	43	157	149			170	207	178	177		91	43	98	82
	114	236	96	134		121	34	163	79			162	236	183	194		23	34	70	63
	167	205	54	133		104	79	196	110			176	205	155	265		105	79	110	42
	142	177	120	185		121	77	152	96			147	177	203	241		91	77	69	34
	207	193	97	189		54	79	164	81			201	193	204	205		89	79	47	46
	148					111						148					111
	109					124						109					124
	177					74						177					74
	193					64						193					64
	20*					256*						20*					256*
	102					90						102					90
	204					51						204					51
N	13	8	8	8		13	8	8	8		N	14	8	8	8		14	8	8	8
mean	161.923	207.75	106	160.125		88.8462	58.625	148	95.25		mean	161.429	207.75	177.625	204.875		83.6429	58.625	80.75	46.75
SEM	10.4596	6.6056	8.3666	13.8595		8.93412	6.25054	10.1665	11.1608		SEM	8.81103	6.6056	8.43449	11.1667		8.17098	6.25054	7.99051	6.42748
-0,95%	139.134	192.13	86.2161	127.352		69.3804	43.8448	123.96	68.859		-0,95%	142.394	192.13	157.681	178.47		65.9905	43.8448	61.8555	31.5514
+0,95%	184.713	223.37	125.784	192.898		108.312	73.4052	172.04	121.641		+0,95%	180.464	223.37	197.569	231.28		101.295	73.4052	99.6445	61.9486
F(1,33)		22.9018	21.3387	0.147075			24.445	18.3444	1.35247		F(1,34)		14.9688	0.490761	1.00585			13.1141	0.821121	0.303761
p		3.46516e-05	5.63684e-05	0.703806			2.17419e-05	0.000149665	0.253187		p		0.000470664	0.488355	0.322983			0.000944283	0.37123	0.585138
	immobility time (s)					climbing time (s)						immobility time (s)					climbing time (s)
	veh	risp	WAY	risp+WAY		veh	risp	way	risp+way			veh	risp	SB	risp+SB		veh	risp	SB	risp+SB
	X	130	121	78		X	123	117	152			170	130	134	155		112	123	102	86
	147	166	119	249		135	120	124	33			117	166	191	165		111	120	59	99
	200	196	124	77		42	27	111	158			184	196	173	121		35	27	91	79
	195	183	117	236		64	64	157	32			170	183	178	251		91	64	98	49
	114	80*	96	171		121	201*	163	83			162	80*	183	194		23	201*	70	57
	167	173	54	85		104	91	196	140			176	173	155	210		105	91	110	65
	142	181	120	145		121	87	152	117			147	181	203	161		91	87	69	80
	207	176	97	149		54	74	164	89			201	176	204	239		89	74	47	41
	148					111						148					111
	109					124						109					124
	177					74						177					74
	193					64						193					64
	20*					256*						20*					256*
	102					90						102					90
	204					51						204					51
N	13	7	8	8		13	7	8	8		N	14	7	8	8		14	7	8	8
mean	161.923	172.143	106	148.75		88.8462	83.7143	148	100.5		mean	161.429	172.143	177.625	187		83.6429	83.7143	80.75	69.5
SEM	10.4596	7.86017	8.3666	24.0496		8.93412	12.5579	10.1665	17.6666		SEM	8.81103	7.86017	8.43449	15.765		8.17098	12.5579	7.99051	7.0102
-0,95%	139.134	152.91	86.2161	91.8817		69.3804	52.9862	123.96	58.7252		-0,95%	142.394	152.91	157.681	149.722		65.9905	52.9862	61.8555	52.9235
+0,95%	184.713	191.376	125.784	205.618		108.312	114.442	172.04	142.275		+0,95%	180.464	191.376	197.569	224.278		101.295	114.442	99.6445	86.0765
F(1,32)		3.41465	7.65616	1.28785			4.45646	9.27746	2.88783		F(1,33)		0.828425	1.97946	0.00368189			0.353827	0.828653	0.362928
p		0.0738816	0.0093232	0.264875			0.0426736	0.00461871	0.098954		p		0.369329	0.168796	0.951981			0.556012	0.369264	0.551002

## Sheet: Table S2
Table S2 FST raw data and descriptive statistic after 21-day administration of haloperidol, risperidon, WAY-181187 and SB-742457, given alone and in combinations
Note: The data were evaluated using two-way analysis of variance (ANOVA), value*―outlier values excluded from statistical analysis, X - an animal terminated because of a significant deterioration of health or died during experiment
Abbreviations: veh―vehicle, halo―haloperidol, risp―risperidone, WAY―WAY-181187, SB―SB-742457, N―number of data included in the statistical analysis, SEM―number of data included in the statistical analysis standard error of the mean, -0,95%/+0,95%―lower/upper bound of 95% confidence interval
	immobility time (s)					climbing time (s)						immobility time (s)					climbing time (s)
	veh	halo	way	halo+way		veh	halo	way	halo+way			veh	halo	SB	halo+SB		veh	halo	SB	halo+SB
	178	267	159	65		101	2	118	153			232	267	33*	223		54	2	230*	44
	173	217	186	143		75	60	96	94			195	217	156	173		74	60	92	56
	173	68*	181	116		109	198*	37	100			158	68*	187	216		59	198*	93	52
	128	242	148	141		135	55	119	91			230	242	115	215		44	55	142	67
	148	200	138	85		138	56	42	96			168	200	132	161		103	56	116	121
	122	153	127	298*		122	117	135	0*			139	153	198	260		96	117	77	27
	232	230	150	201		53	22	116	60			157	230	195	220		88	22	81	75
	210	200	194	142		69	26	76	56			137	200	132	210		149	26	150	63
	123	167	199	183		144	69	22	93			174	167	222	237		87	69	63	61
	156	275	195	68		65	20	87	141			178	275	X	91*		101	20	X	176*
												173					75
												173					109
												128					135
												148					138
												122					122
												232					53
												210					69
												123					144
												156					65
N	10	9	10	9		10	9	10	9		N	19	9	8	9		19	9	8	9
mean	164.3	216.778	167.7	127.111		101.1	47.4444	84.8	98.2222		mean	170.158	216.778	167.125	212.778		92.8947	47.4444	101.75	62.8889
SEM	11.6228	13.8602	8.3294	16.029		10.6348	11.4965	12.4871	10.6586		SEM	8.18902	13.8602	13.6571	10.0413		7.56643	11.4965	11.074	8.624
-0,95%	138.007	184.816	148.858	90.1482		77.0424	20.9334	56.5521	73.6435		-0,95%	152.953	184.816	134.831	189.623		76.9983	20.9334	75.5641	43.0019
+0,95%	190.593	248.739	186.542	164.074		125.158	73.9554	113.048	122.801		+0,95%	187.362	248.739	199.419	235.933		108.791	73.9554	127.936	82.7759
F(1,34)		0.224354	11.8124	13.748			3.11036	2.28411	8.6456		F(1,41)		16.0276	0.0931085	0.00176063			17.6405	1.46535	0.107746
p		0.63877	0.00157027	0.000741648			0.0867815	0.139945	0.00585998		p		0.000255814	0.761806	0.966734			0.000140195	0.233013	0.744395
	immobility time (s)					climbing time (s)						immobility time (s)					climbing time (s)
	veh	risp	way	risp+way		veh	risp	way	risp+way			veh	risp	SB	risp+SB		veh	risp	SB	risp+SB
	186	152	159	88		50	91	118	104			186	152	33*	190		50	91	230*	78
	224	153	186	234		56	113	96	68			194	153	156	203		86	113	92	74
	168	160	181	216		105	60	37	58			168	160	187	128		105	60	93	135
	154	201	148	192		101	87	119	68			154	201	115	138		101	87	142	145
	42*	203	138	200		227*	42	42	22			42*	203	132	177		227*	42	116	72
	155	200	127	205		107	68	135	72			155	200	198	220		107	68	77	66
	124	101	150	133		99	90	116	93			154	101	195	144		69	90	81	99
	177	157	194	134		97	104	76	68			177	157	132	214		97	104	150	47
	199	204	199	144		75	48	22	65			199	204	222	208		75	48	63	88
	178	295*	195	222		101	2*	87	63			232	295*	X	180		54	2*	X	89
	123					125						195					74
	128					135						158					59
	148					138						230					44
	122					122						168					103
	232					53						139					96
	210					69						157					88
	123					144						137					149
	156					65						174					87
N	17	9	10	10		17	9	10	10		N	17	9	8	10		17	9	8	10
mean	165.118	170.111	167.7	176.8		96.5882	78.1111	84.8	68.1		mean	177.5	170.111	167.125	180.222		80.9375	78.1111	101.75	89.3333
SEM	8.7724	11.6362	8.3294	15.3216		7.44048	8.2621	12.4871	6.82064		SEM	6.74722	11.6362	13.6571	11.7506		5.20374	8.2621	11.074	10.7238
-0,95%	146.521	143.278	148.858	142.14		80.8151	59.0587	56.5521	52.6706		-0,95%	163.119	143.278	134.831	153.125		69.846	59.0587	75.5641	64.6042
+0,95%	183.714	196.944	186.542	211.46		112.361	97.1636	113.048	83.5294		+0,95%	191.881	196.944	199.419	207.319		92.029	97.1636	127.936	114.062
F(1,42)		0.388454	0.168105	0.0329804			3.67837	1.41261	0.00938794		F(1,40)		0.0736003	0.000157291	0.947939			0.811313	3.58333	0.321149
p		0.536483	0.683886	0.856766			0.061939	0.241301	0.923274		p		0.787633	0.990059	0.336402			0.373406	0.0659969	0.57425

## Sheet: Table S3
Table S3 OFT raw data and descriptive statistic after single and 21-day administration of haloperidol, risperidon, WAY-181187 and SB-742457, given alone and in combinations
Note: The data were evaluated using two-way analysis of variance (ANOVA), value*―outlier values excluded from statistical analysis
Abbreviations: veh―vehicle, halo―haloperidol, risp―risperidone, WAY―WAY-181187, SB―SB-742457, N―number of data included in the statistical analysis, SEM―number of data included in the statistical analysis standard error of the mean, -0,95%/+0,95%―lower/upper bound of 95% confidence interval
	acute OFT												chronic OFT
	total disctance (cm)						total distance (cm)						total disctance (cm)						total distance (cm)
	veh	halo	WAY	halo+WAY			veh	halo	SB	halo+SB			veh	halo	WAY	halo+WAY			veh	halo	SB	halo+SB
	1983	742	2434	186			1983	742	2643	734			2092	2839	2086	2717			2244	2839	3031	2807
	1441	1930	1438	518			1441	1930	1740	701			2042	2995	2450	3271			1797	2995	2232	3291
	2018	1419	2071	221			2018	1419	2119	1895			2675	1899	2291	3348			2920	1899	3020	3249
	2146	1358	2016	158			2146	1358	1438	1875			2063	1709	2704	3062			2305	1709	3584	3688
	2253	2249	2176	1788*			2253	2249	1774	1238			2272	2822	2645	3064			3340	2822	2833	2856
	1717	15*	2145	690			1717	15*	2272	767			1695	2446	3120	2803			2990	2446	3221	3188
	2127						2127						2409						2092
	1716						1716						2937						2042
	2106						2106						2565						2675
	1585						1585						2489						2063
	2245						2245						2576						2272
	2607						2607						2734						1695
	2053						2053
	1971						1971
	1977						1977
	2195						2195
	1911						1911
N	17	5	6	5		N	17	5	6	6		N	12	6	6	6		N	12	6	6	6
mean	2003	1539.6	2046.67	354.6		mean	2003	1539.6	1997.67	1201.67		mean	2379.08	2451.67	2549.33	3044.17		mean	2369.58	2451.67	2986.83	3179.83
SEM	67.4428	258.781	135.207	105.858		SEM	67.4428	258.781	176.643	230.487		SEM	102.488	219.044	147.198	101.6		SEM	145.997	219.044	183.297	131.569
-0,95%	1860.03	821.11	1699.1	60.6905		-0,95%	1860.03	821.11	1543.59	609.182		-0,95%	2153.51	1888.6	2170.95	2782.99		-0,95%	2048.25	1888.6	2515.65	2841.62
+0,95%	2145.97	2258.09	2394.23	648.51		+0,95%	2145.97	2258.09	2451.74	1794.15		+0,95%	2604.66	3014.74	2927.72	3305.34		+0,95%	2690.92	3014.74	3458.01	3518.04
F(1,29)		64.3179	18.0333	20.8986		F(1,30)		15.7362	1.16906	1.09753		F(1,26)		3.79074	6.84991	2.09923		F(1,26)		0.583496	13.958	0.0948644
p		7.62036e-09	0.000204066	8.33177e-05		p		0.000418185	0.28821	0.303175		p		0.0624151	0.0145789	0.159328		p		0.451822	0.000927013	0.760536
	total distance (cm)						total distance (cm)						total distance (cm)						total distance (cm)
	veh	risp	WAY	risp+WAY			veh	risp	SB	risp+SB			veh	risp	WAY	risp+WAY			veh	risp	SB	risp+SB
	1983	1897	2434	1999			1983	1897	2643	2089			2409	1904	2086	2771			2244	1904	3031	3145
	1441	1691	1438	2051			1441	1691	1740	1889			2937	1828	2450	3289			1797	1828	2232	3367
	2018	2741*	2071	1965			2018	2741*	2119	2306			2565	2428	2291	1862			2920	2428	3020	3568
	2146	1798	2016	1818			2146	1798	1438	1936			2489	2447	2704	2361			2305	2447	3584	2851
	2253	1673	2176	2042			2253	1673	1774	1757			2576	2896	2645	2596			3340	2896	2833	2659
	1717	1544	2145	1950			1717	1544	2272	1353			2734	2651	3120	1486			2990	2651	3221	3366
	2127						2127						2092						2092
	1716						1716						2042						2042
	2106						2106						2675						2675
	1585						1585						2063						2063
	2245						2245						2272						2272
	2607						2607						1695						1695
	2053						2053
	1971						1971
	1977						1977
	2195						2195
	1911						1911
N	17	5	6	6		N	17	5	6	6		N	12	6	6	6		N	12	6	6	6
mean	2003	1720.6	2046.67	1970.83		mean	2003	1720.6	1997.67	1888.33		mean	2379.08	2359	2549.33	2394.17		mean	2369.58	2359	2986.83	3159.33
SEM	67.4428	59.765	135.207	34.6943		SEM	67.4428	59.765	176.643	131.759		SEM	102.488	170.795	147.198	264.104		SEM	145.997	170.795	183.297	141.239
-0,95%	1860.03	1554.67	1699.1	1881.65		-0,95%	1860.03	1554.67	1543.59	1549.64		-0,95%	2153.51	1919.96	2170.95	1715.26		-0,95%	2048.25	1919.96	2515.65	2796.27
+0,95%	2145.97	1886.53	2394.23	2060.02		+0,95%	2145.97	1886.53	2451.74	2227.03		+0,95%	2604.66	2798.04	2927.72	3073.07		+0,95%	2690.92	2798.04	3458.01	3522.4
F(1,30)		3.43419	2.31149	1.14186		F(1,30)		2.81117	0.483145	0.548697		F(1,26)		0.273552	0.375833	0.162528		F(1,26)		0.220681	16.9153	0.28215
p		0.0737189	0.138892	0.293783		p		0.104002	0.49235	0.464609		p		0.605388	0.545168	0.690136		p		0.642438	0.000348156	0.599805

## Sheet: Table S4
Table S4 EPM test raw data and descriptive statistic after single administration of haloperidol, risperidon, WAY-181187 and SB-742457, given alone and in combinations
Note: The data were evaluated using two-way analysis of variance (ANOVA), value*―outlier values excluded from statistical analysis, X - an animal terminated because of a significant deterioration of health or died during experiment
Abbreviations: veh―vehicle, halo―haloperidol, risp―risperidone, WAY―WAY-181187, SB―SB-742457, OA - open arms, N―number of data included in the statistical analysis, SEM―number of data included in the statistical analysis standard error of the mean, -0,95%/+0,95%―lower/upper bound of 95% confidence interval
	time in OA (s)					% of time in OA					number of OA entries					% of OA entries
	veh	halo	WAY	halo+WAY		veh	halo	WAY	halo+WAY		veh	halo	WAY	halo+WAY		veh	halo	WAY	halo+WAY
	85.4	0	55.8	237,6*		38.8889	0	24.5923	81,0*		7	0	10	2,0*		30.4348	0	29.4118	25,0*
	140,1*	0.2	84.2	0		58,3*	0.0677966	39.3091	0		25*	0	14	0		55,6*	0	32.5581	0
	53.6	15.3	29.4	28.1		20.2647	9.33496	13.4554	10.1334		11	2	9	4		44	22.2222	25.7143	28.5714
	62.4	6	70.6	0.3		28.0323	2.24551	25.3137	0.101695		16	3	7	0		35.5556	27.2727	20.5882	0
	15.2	0.3	67.3	27.1		6.38655	0.107296	47.2612	11.5516		7	1	14	3		20	50	50	16.6667
	37.8	300*	95.8	0.7		15.1564	100*	43.3484	0.333492		9	0*	14	0		20.4545	0*	32.5581	0
	49	6,8*	54.6	0.2		20.7891	69,4*	23.6159	0.0671366		9	25*	7	0		28.125	71,4*	20.5882	0
	48.9	0	91.9	9.4		23.4758	0	35.9265	3.6		15	0	8	3		34.8837	0	32	21.4
	7.8					3.34764					8					42.1053
	9.1					3.48125					8					38.0952
	56					26.5907					12					30.7692
	77.8					34.3488					10					35.7143
	33.1					13.9604					6					27.2727
	61.7					31.641					11					35.4839
	49.4					18.4191					6					37.5
N	14	6	8	7		14	6	8	7		14	6	8	7		14	6	8	7
mean	46.2286	3.63333	68.7	9.4		20.3416	1.95926	31.6028	3.6839		9.64286	1	10.375	1.42857		32.8853	16.5825	30.4274	9.51973
SEM	6.31942	2.52331	7.82416	4.86601		2.97907	1.51842	4.10367	1.91618		0.829452	0.516398	1.11704	0.685119		1.9159	8.34217	3.3045	4.67437
-0,95%	32.5763	-2.85305	50.1988	-2.50671		13.9057	-1.94395	21.8992	-1.00482		7.85094	-0.327443	7.73363	-0.247854		28.7463	-4.86174	22.6135	-1.91804
+0,95%	59.8809	10.1197	87.2012	21.3067		26.7775	5.86248	41.3065	8.37263		11.4348	2.32744	13.0164	3.105		37.0243	38.0267	38.2412	20.9575
F(1,31)		53.5396	4.11186	1.43896			47.2211	3.71442	2.00325			85.0798	0.370493	0.0253426			19.7984	1.2961	0.303197
p		3.0995e-08	0.051253	0.239396			1.05601e-07	0.0631515	0.166931			2.12777e-10	0.54717	0.874549			0.0001033	0.263648	0.585832
	time in OA (s)					% of time in OA					number of OA entries					% of OA entries
	veh	risp	WAY	risp+WAY		veh	risp	WAY	risp+WAY		veh	risp	WAY	risp+WAY		veh	risp	WAY	risp+WAY
	85.4	34.3	55.8	0,0*		38.8889	13.8084	24.5923	0,0*		7	7	10	0*		30.4348	21.2121	29.4118	0,0*
	140,1*	73.2	84.2	41.3		58,3*	31.6335	39.3091	16.4542		25*	10	14	6		55,6*	34.4828	32.5581	21.4286
	53.6	77.7	29.4	51.1		20.2647	31.5982	13.4554	19.8216		11	8	9	5		44	33.3333	25.7143	21.7391
	62.4	48.9	70.6	37.2		28.0323	20.1983	25.3137	13.1171		16	13	7	7		35.5556	34.2105	20.5882	53.8462
	15.2	57.2	67.3	14.2		6.38655	23.3469	47.2612	5.74899		7	10	14	9		20	29.4118	50	27.2727
	37.8	60.2	95.8	28.4		15.1564	26.3342	43.3484	10.0852		9	13	14	3		20.4545	39.3939	32.5581	15.7895
	49	42.3	54.6	27.1		20.7891	16.6339	23.6159	9.41626		9	6	7	3		28.125	18.75	20.5882	42.8571
	48.9	38	91.9	X		23.4758	14.0429	35.9265	X		15	5	8	X		34.8837	62.5	32	X
	7.8					3.34764					8					42.1053
	9.1					3.48125					8					38.0952
	56					26.5907					12					30.7692
	77.8					34.3488					10					35.7143
	33.1					13.9604					6					27.2727
	61.7					31.641					11					35.4839
	49.4					18.4191					6					37.5
N	14	8	8	6		14	8	8	6		14	8	8	6		14	8	8	6
mean	46.2286	53.975	68.7	33.2167		20.3416	22.1995	31.6028	12.4405		9.64286	9	10.375	5.5		32.8853	34.1618	30.4274	30.4889
SEM	6.31942	5.64737	7.82416	5.23854		2.97907	2.56234	4.10367	2.0858		0.829452	1.06904	1.11704	0.957427		1.9159	4.74154	3.3045	6.00999
-0,95%	32.5763	40.6211	50.1988	19.7506		13.9057	16.1406	21.8992	7.07882		7.85094	6.47211	7.73363	3.03886		28.7463	22.9499	22.6135	15.0397
+0,95%	59.8809	67.3289	87.2012	46.6828		26.7775	28.2585	41.3065	17.8023		11.4348	11.5279	13.0164	7.96114		37.0243	45.3738	38.2412	45.938
F(1,32)		3.79076	0.0144602	9.20822			6.423	0.0484056	9.47766			6.96508	1.75256	4.09738			0.0324043	0.680337	0.026719
p		0.0603584	0.905037	0.00475571			0.0163568	0.827259	0.00424593			0.012734	0.194935	0.0513648			0.858278	0.415577	0.871185
	time in OA (s)					% of time in OA					number of OA entries					% of OA entries
	veh	halo	SB	halo+SB		veh	halo	SB	halo+SB		veh	halo	SB	halo+SB		veh	halo	SB	halo+SB
	104.5	0	110.5	12.9		57.1976	0	44.755	5.27176		19	0	19	9		46.3415	0	51.3514	50
	106.7	0.2	136	41.2		51.0526	0.0677966	54.4872	15.6179		11	0	14	5		45.8333	0	34.1463	33.3333
	92.7	15.3	103.5	2.5		37.9918	9.33496	44.0426	0.864155		19	2	17	2		51.3514	22.2222	51.5152	28.5714
	129.1	6	72.2	2.3		51.3116	2.24551	30.6582	0.78072		16	3	16	6		42.1053	27.2727	35.5556	54.5455
	70.4	0.3	1,3*	21.8		27.2025	0.107296	2,2*	7.45554		18	1	1*	2		40.9091	50	16,7*	66.6667
	76	300*	130.5	33.3		33.7928	100*	54.9242	11.5545		14	0*	19	6		35	0*	40.4255	85.7143
	133.6	6,8*	87.8	45.5		57.7106	69,4*	37.4095	23.2618		17	25*	12	5		48.5714	71,4*	28.5714	22.7273
	47.8	0	73.9	0,2*		17.5092	0	35.5288	0,1*		8	0	19	0*		42.1053	0	40.4255	0,0*
	39.1					13.418					8					38.0952
	56					26.5907					12					30.7692
	77.8					34.3488					10					35.7143
	33.1					13.9604					6					27.2727
	91.6					41.0578					23					46
	61.7					31.641					11					35.4839
	49.4					18.4191					6					37.5
N	15	6	7	7		15	6	7	7		15	6	7	7		15	6	7	7
mean	77.9667	3.63333	102.057	22.7857		34.2136	1.95926	43.1151	9.25804		13.2	1	16.5714	5		40.2035	16.5825	40.2844	48.7941
SEM	8.07708	2.52331	9.6634	6.71787		3.9052	1.51842	3.51056	3.09872		1.35997	0.516398	1.04328	0.92582		1.7491	8.34217	3.25824	8.51404
-0,95%	60.643	-2.85305	78.4116	6.34769		25.8378	-1.94395	34.525	1.67574		10.2832	-0.327443	14.0186	2.7346		36.4521	-4.86174	32.3118	27.961
+0,95%	95.2903	10.1197	125.703	39.2237		42.5894	5.86248	51.7051	16.8403		16.1168	2.32744	19.1242	7.2654		43.955	38.0267	48.257	69.6272
F(1,31)		71.4999	5.66663	0.0738949			62.2608	3.73856	0.0365881			70.5884	6.78775	0.0493551			2.19244	10.012	9.91196
p		1.49734e-09	0.0236217	0.78755			6.6059e-09	0.0623469	0.849553			1.72276e-09	0.0139744	0.825646			0.148783	0.00347291	0.00361824
	time in OA (s)					% of time in OA					number of OA entries					% of OA entries
	veh	risp	SB	risp+SB		veh	risp	SB	risp+SB		veh	risp	SB	risp+SB		veh	risp	SB	risp+SB
	85.4	34.3	110.5	51.3		38.8889	13.8084	44.755	22.7798		17	7	19	10		51.5152	21.2121	51.3514	33.3
	110.1	73.2	136	47		52.3289	31.6335	54.4872	17.7492		12	10	14	5		37.5	34.4828	34.1463	29.4118
	53.6	77.7	103.5	69.6		20.2647	31.5982	44.0426	32.4627		11	8	17	11		44	33.3333	51.5152	42.3077
	62.4	48.9	72.2	117,2*		28.0323	20.1983	30.6582	38,7*		16	13	16	20*		35.5556	34.2105	35.5556	87,3*
	67.8	57.2	1,3*	24.6		24.2663	23.3469	2,2*	8.95197		9	10	1*	4		20.4545	29.4118	16,7*	18.1818
	49	60.2	130.5	40.9		20.7891	26.3342	54.9242	14.1866		9	13	19	6		28.125	39.3939	40.4255	18.8
	48.9	42.3	87.8	54.3		23.4758	16.6339	37.4095	30.1834		17	6	12	9		37.7778	18.75	28.5714	50
	116.7	38	73.9	35.7		53.2877	14.0429	35.5288	12.4088		11	5	19	4		45.8333	62.5	40.4255	40
	92.7					37.9918					19					51.3514
	129.1					51.3116					16					42.1053
	70.4					27.2025					18					40.9091
	76					33.7928					14					35
	56.9					24.4311					18					28.125
	123.6					55.8014					17					48.5714
N	14	8	7	7		14	8	7	7		14	8	7	7		14	8	7	7
mean	81.6143	53.975	102.057	46.2		35.1332	22.1995	43.1151	19.8175		14.5714	9	16.5714	7		39.0588	34.1618	40.2844	33.143
SEM	7.57533	5.64737	9.6634	5.44391		3.51365	2.56234	3.51056	3.3984		0.935939	1.06904	1.04328	1.1127		2.45599	4.74154	3.25824	4.52157
-0,95%	65.2488	40.6211	78.4116	32.8792		27.5424	16.1406	34.525	11.5019		12.5495	6.47211	14.0186	4.27733		33.753	22.9499	32.3118	22.0792
+0,95%	97.9798	67.3289	125.703	59.5208		42.724	28.2585	51.7051	28.1331		16.5934	11.5279	19.1242	9.72267		44.3647	45.3738	48.257	44.2069
F(1,32)		26.5973	0.612221	3.03774			24.0857	0.575362	1.97079			47.3905	0	3.30671			2.62705	0.000775428	0.0913096
p		1.25773e-05	0.439705	0.0909527			2.59805e-05	0.453687	0.169995			8.6269e-08	1	0.0783687			0.11487	0.977958	0.764474

## Sheet: Table S5
Table S5 EPM exploration raw data and descriptive statistic after single administration of haloperidol, risperidon, WAY-181187 and SB-742457, given alone and in combinations
Note: The data were evaluated using two-way analysis of variance (ANOVA), value*―outlier values excluded from statistical analysis, X - an animal terminated because of a significant deterioration of health or died during experiment
Abbreviations: veh―vehicle, halo―haloperidol, risp―risperidone, WAY―WAY-181187, SB―SB-742457, N―number of data included in the statistical analysis, SEM―number of data included in the statistical analysis standard error of the mean, -0,95%/+0,95%―lower/upper bound of 95% confidence interval
	total entries					total distance (cm)
	veh	halo	WAY	halo+WAY		veh	halo	WAY	halo+WAY
	23	6	34	8*		3752	1163	4451	1728*
	45*	1	43	1		6282*	1091	5020	809
	25	9	35	14		4183	1574	4659	2658
	45	11	33	1		5039	1765	3874	554
	33	2	29	18		4377	595	4100	2842
	44	0*	43	6		5785	26*	4806	908
	32	35*	34	1		5037	551*	4678	665
	45	7	25	7		4928	1667	4152	1406
	19					2909
	21					3528
	39					4821
	28					4071
	22					3502
	31					4976
	16					2908
N	14	6	8	7		14	6	8	7
mean	30.2143	6	34.5	6.85714		4272.57	1309.17	4467.5	1406
SEM	2.65234	1.59164	2.18763	2.57671		233.046	181.196	139.382	362.169
-0,95%	24.4842	1.90855	29.3271	0.55215		3769.11	843.387	4137.91	519.804
+0,95%	35.9443	10.0915	39.6729	13.1621		4776.04	1774.95	4797.09	2292.2
F(1,31)		86.5728	0.851478	0.378435			127.336	0.298612	0.0337556
p		1.74169e-10	0.363261	0.542932			1.6579e-12	0.588666	0.855424
	total entries					total distance (cm)
	veh	risp	WAY	risp+WAY		veh	risp	WAY	risp+WAY
	23	30	34	1*		3752	3763	4451	52*
	45*	29	43	28		6282*	4706	5020	4040
	25	24	35	23		4183	3869	4659	3554
	45	41	33	13		5039	4193	3874	2637
	33	34	29	33		4377	3843	4100	4126
	44	33	43	18		5785	4382	4806	2483
	32	32	34	9		5037	4035	4678	2667
	45	8	25	X		4928	2134	4152	X
	19					2909
	21					3528
	39					4821
	28					4071
	22					3502
	31					4976
	16					2908
N	14	8	8	6		14	8	8	6
mean	30.2143	28.875	35.6667	20.6667		4272.57	3865.62	4627.67	3251.17
SEM	2.65234	3.43531	2.75278	3.71184		233.046	271.185	122.026	304.84
-0,95%	24.4842	20.7518	28.5904	11.1251		3769.11	3224.37	4313.99	2467.55
+0,95%	35.9443	36.9982	42.7429	30.2083		4776.04	4506.88	4941.35	4034.78
F(1,32)		5.75493	0.384655	3.90234			9.66273	0.645414	2.40229
p		0.0224409	0.539514	0.0568968			0.00393	0.427684	0.130993
	total entries					total distance (cm)
	veh	halo	SB	halo+SB		veh	halo	SB	halo+SB
	41	6	37	18		4438	1163	4991	2216
	24	1	41	15		3677	1091	5518	2489
	37	9	33	7		4970	1574	6032	1548
	38	11	45	6		4933	1765	4702	1899
	44	2	6*	3		5138	595	1358*	1052
	40	0*	47	7		4772	26*	5283	2048
	35	35*	42	27		4695	551*	5199	3550
	19	7	47	1*		2909	1667	5546	355*
	21					3528
	39					4821
	28					4071
	22					3502
	50					5212
	31					4976
	16					2908
N	15	6	7	7		15	6	7	7
mean	32.3333	6	41.7143	11.8571		4303.33	1309.17	5324.43	2114.57
SEM	2.63433	1.59164	1.98463	3.22511		207.658	181.196	162.074	297.285
-0,95%	26.6833	1.90855	36.8581	3.96557		3857.95	843.387	4927.85	1387.14
+0,95%	37.9834	10.0915	46.5705	19.7487		4748.72	1774.95	5721.01	2842
F(1,31)		88.2991	6.4937	0.347261			154.742	13.4122	0.187035
p		1.38618e-10	0.0159993	0.559938			1.37335e-13	0.000924775	0.66839
	total entries					total distance (cm)
	veh	risp	SB	risp+SB		veh	risp	SB	risp+SB
	23	30	37	33		3752	3763	4991	4188
	32	29	41	17		4711	4706	5518	3154
	25	24	33	26		4183	3869	6032	4573
	45	41	45	23*		5039	4193	4702	5936*
	44	34	6*	22		5785	3843	1358*	3851
	32	33	47	29		5037	4382	5283	4384
	45	32	42	18		4928	4035	5199	3551
	24	8	47	10		3677	2134	5546	3385
	37					4970
	38					4933
	44					5138
	40					4772
	74					5461
	35					4695
N	14	8	7	7		14	8	7	7
mean	38.4286	28.875	41.7143	22.1429		4791.5	3865.62	5324.43	3869.43
SEM	3.42857	3.43531	1.98463	2.97152		156.481	271.185	162.074	201.75
-0,95%	31.0216	20.7518	36.8581	14.8718		4453.44	3224.37	4927.85	3375.76
+0,95%	45.8355	36.9982	46.5705	29.4139		5129.56	4506.88	5721.01	4363.09
F(1,32)		16.8734	0.236271	1.99628			33.0381	1.67903	1.63177
p		0.000258517	0.630225	0.167339			2.25489e-06	0.204323	0.210649

## Sheet: Table S6
Table S6 EPM test raw data and descriptive statistic after 21-day administration of haloperidol, risperidon, WAY-181187 and SB-742457, given alone and in combinations
Note: The data were evaluated using two-way analysis of variance (ANOVA), value*―outlier values excluded from statistical analysis, X - an animal terminated because of a significant deterioration of health or died during experiment
Abbreviations: veh―vehicle, halo―haloperidol, risp―risperidone, WAY―WAY-181187, SB―SB-742457, OA - open arms, N―number of data included in the statistical analysis, SEM―number of data included in the statistical analysis standard error of the mean, -0,95%/+0,95%―lower/upper bound of 95% confidence interval
	time in OA (s)					% of time in OA					number of OA entries					% of OA entries
	veh	halo	WAY	halo+WAY		veh	halo	WAY	halo+WAY		veh	halo	WAY	halo+WAY		veh	halo	WAY	halo+WAY
	10.8	13.5	44.8	68.1		4.92476	5.24679	19.6923	30.4018		6	2	9	13		20	9.09091	20.4545	28.2609
	10.7	58.1	63.8	41.7		4.81332	25.8452	26.266	13.8079		7	8	10	3		12.7273	22.2222	25.641	15.7895
	30.6	21	120.1	40.7		12.6134	9.44245	50.8898	16.0742		8	9	13	3		18.1818	33.3333	36.1111	23.0769
	55.3	33.4	26	99.3		25.5074	13.4515	9.92745	43.3057		12	6	10	16		29.2683	26.087	40	44.4444
	67.8	74.2	120.4	41.4		25.5463	36.5517	56	15.4709		8	15	15	4		28.5714	34.0909	30.6122	13.7931
	83.2	21.2	130.4	85.4		31.635	9.33099	54.1528	41.7808		8	8	12	15		19.5122	34.7826	35.2941	39.4737
	67.7	15.3	65.6	36.1		25.5858	6.51341	27.7378	13.0845		7	5	7	4		43.75	10.8696	23.3333	23.5294
	83.3	29.8	55.8	80.9		32.3495	13.122	21.8224	35.3739		14	4	4	8		36.8421	11.7647	18.1818	33.3333
	76.5	20.3	58.6	34.8		29.4005	7.51017	25.0964	14.3387		12	2	10	8		50	22.2222	25	18.1818
	53.8	X	27	94.4		23.371	X	11.811	36.646		15	X	8	7		46.875	X	16	28
	54.9					26.0313					11					30.5556
	60.3					26.4822					9					31.0345
	23.7					8.9434					5					19.2308
	76					30.9194					9					18.3673
	92.5					40.393					18					41.8605
	92.7					42.1364					15					25.4237
	197,4*					73,5*					7*					43,8*
	19.3					10.1206					10					23.8095
	10					3.38983					4					23.5294
N	18	9	10	10		18	9	10	10		18	9	10	10		18	9	10	10
mean	53.8389	31.8667	71.25	62.28		22.4535	14.1127	30.3396	26.0284		9.88889	6.55556	9.8	8.1		28.8633	22.7182	27.0628	26.7883
SEM	6.87139	6.93658	12.2439	8.22127		2.84874	3.47052	5.4207	3.98598		0.899851	1.35515	0.986577	1.56667		2.58354	3.42678	2.57058	3.17534
-0,95%	39.3415	15.8709	43.5524	43.6822		16.4432	6.10966	18.0771	17.0115		7.99037	3.43058	7.56821	4.55595		23.4125	14.816	21.2478	19.6052
+0,95%	68.3362	47.8624	98.9476	80.8778		28.4638	22.1157	42.6021	35.0453		11.7874	9.68053	12.0318	11.644		34.3141	30.6203	32.8779	33.9714
F(1,43)		2.99511	7.15499	0.528864			2.52825	6.19317	0.256469			4.31524	0.36087	0.454405			1.1009	0.137609	0.920646
p		0.090688	0.0105301	0.471026			0.119151	0.0167753	0.615143			0.0437799	0.551177	0.503859			0.299931	0.712491	0.34267
	time in OA (s)					% of time in OA					number of OA entries					% of OA entries
	veh	risp	WAY	risp+WAY		veh	risp	WAY	risp+WAY		veh	risp	WAY	risp+WAY		veh	risp	WAY	risp+WAY
	10.8	0.3	44.8	58.1		4.92476	0.113208	19.6923	21.2509		6	1	9	13		20	4.54545	20.4545	44.8276
	10.7	8.7	63.8	57.9		4.81332	3.66162	26.266	23.2717		7	6	10	9		12.7273	11.1111	25.641	28.125
	30.6	7.8	120.1	9.4		12.6134	3.3534	50.8898	3.19402		8	3	13	6		18.1818	7.89474	36.1111	18.1818
	55.3	14.9	26	17.9		25.5074	6.56966	9.92745	5.64313		12	3	10	2		29.2683	12.5	40	15.3846
	67.8	18.7	120.4	148,0*		25.5463	9.27119	56	51,2*		8	9	15	3*		28.5714	16.6667	30.6122	50*
	83.2	37.2	130.4	35.5		31.635	15.0182	54.1528	11.8019		8	7	12	9		19.5122	13.2075	35.2941	27.2727
	67.7	4.9	65.6	50.1		25.5858	1.85325	27.7378	22.4764		7	3	7	10		43.75	20	23.3333	24.3902
	146	19.1	55.8	11.1		59.9097	9.13876	21.8224	4.13254		8	6	4	3		27.5862	14.2857	18.1818	8.33333
	83.3	23.7	58.6	64.1		32.3495	10.9166	25.0964	26.0781		14	8	10	12		36.8421	14.8148	25	34.2857
	4.5	28.8	27	33.7		1.58284	11.2062	11.811	11.8329		1	6	8	8		25	24	16	23.5294
	33.1					12.098					4					23.5294
	1.8					0.73141					2					11.7647
	79.9					34.9825					15					42.8571
	1.3					0.594966					2					5.26316
	10.5					5.93556					5					13.1579
	25.3					12.1576					9					19.1489
	33.2					13.9028					7					21.2121
	27.8					14.3151					11					20.3704
	0					0					0					0
N	19	10	10	9		19	10	10	9		19	10	10	9		19	10	10	9
mean	40.6737	16.41	71.25	37.5333		16.7993	7.11021	30.3396	14.4091		7.05263	5.2	9.8	8		22.0391	13.9026	27.0628	24.9256
SEM	8.93126	3.61974	12.2439	7.06714		3.58421	1.51099	5.4207	3.00062		0.953521	0.81377	0.986577	1.24722		2.61357	1.76902	2.57058	3.56194
-0,95%	21.9098	8.22157	43.5524	21.2365		9.26912	3.69211	18.0771	7.48963		5.04936	3.35912	7.56821	5.12391		16.5482	9.90081	21.2478	16.7118
+0,95%	59.4376	24.5984	98.9476	53.8302		24.3294	10.5283	42.6021	21.3285		9.05591	7.04088	12.0318	10.8761		27.53	17.9044	32.8779	33.1395
F(1,44)		8.92797	7.09849	0.237317			10.0606	6.65645	0.597113			2.83063	6.52898	0.000587711			3.09448	7.54926	1.05519
p		0.00458	0.0107423	0.628569			0.00275997	0.0132954	0.443813			0.0995666	0.0141467	0.980769			0.085511	0.00866964	0.309928
	time in OA (s)					% of time in OA					number of OA entries					% of OA entries
	veh	halo	SB	halo+SB		veh	halo	SB	halo+SB		veh	halo	SB	halo+SB		veh	halo	SB	halo+SB
	10.8	13.5	62.4	60		4.92476	5.24679	28.8089	25.8621		6	2	7	11		20	9.09091	25.9259	26.8293
	10.7	58.1	56.5	105.1		4.81332	25.8452	24.5226	46.4018		7	8	6	17		12.7273	22.2222	25	29.3103
	30.6	21	63.8	55		12.6134	9.44245	26.7842	21.9824		8	9	7	5		18.1818	33.3333	18.4211	23.8095
	55.3	33.4	97.7	115.8		25.5074	13.4515	37.39	50.2168		12	6	5	17		29.2683	26.087	26.3158	40.4762
	67.8	74.2	51.6	94.9		25.5463	36.5517	21.4821	42.8636		8	15	4	12		28.5714	34.0909	10.5263	30
	83.2	21.2	83	114.8		31.635	9.33099	39.656	56.8598		8	8	15	18		19.5122	34.7826	46.875	58.0645
	67.7	15.3	64.8	106.1		25.5858	6.51341	29.9861	45.1489		7	5	12	9		43.75	10.8696	34.2857	39.1304
	83.3	29.8	44.8	49.5		32.3495	13.122	20.2166	21.41		14	4	6	12		36.8421	11.7647	15.3846	25.5319
	76.5	20.3	150,0*	113.6		29.4005	7.51017	60,8*	46.0105		12	2	20*	16		50	22.2222	39,2*	47.0588
	53.8	X	64.6	55.9		23.371	X	29.2308	21.0467		15	X	18	4		46.875	X	35.2941	21.0526
	54.9					26.0313					11					30.5556
	60.3					26.4822					9					31.0345
	23.7					8.9434					5					19.2308
	76					30.9194					9					18.3673
	92.5					40.393					18					41.8605
	92.7					42.1364					15					25.4237
	197,4*					73,5*					7*					43,8*
	19.3					10.1206					10					23.8095
	10					3.38983					4					23.5294
N	18	9	9	10		18	9	9	10		18	9	9	10		18	9	9	10
mean	53.8389	31.8667	65.4667	87.07		22.4535	14.1127	28.6752	37.7803		9.88889	6.55556	8.88889	12.1		28.8633	22.7182	26.4476	34.1264
SEM	6.87139	6.93658	5.34839	8.93873		2.84874	3.47052	2.18161	4.32116		0.899851	1.35515	1.63677	1.58079		2.58354	3.42678	3.72615	3.72728
-0,95%	39.3415	15.8709	53.1333	66.8492		16.4432	6.10966	23.6444	28.0051		7.99037	3.43058	5.11449	8.52401		23.4125	14.816	17.8551	25.6947
+0,95%	68.3362	47.8624	77.8001	107.291		28.4638	22.1157	33.7061	47.5554		11.7874	9.68053	12.6633	15.676		34.3141	30.6203	35.0401	42.5581
F(1,42)		0.000556961	18.2806	7.77176			0.0120826	18.483	6.29687			0.00208173	2.87797	5.96857			0.0508925	1.7498	4.13509
p		0.981283	0.000107388	0.00793758			0.912996	9.97523e-05	0.0160384			0.963825	0.0971999	0.0188486			0.822612	0.19306	0.0483529
	time in OA (s)					% of time in OA					number of OA entries					% of OA entries
	veh	risp	SB	risp+SB		veh	risp	SB	risp+SB		veh	risp	SB	risp+SB		veh	risp	SB	risp+SB
	5.1	0.3	62.4	131.5		1.94138	0.113208	28.8089	52.7477		6	1	7	15		28.5714	4.54545	25.9259	38.4615
	1.5	8.7	56.5	52.6		0.635324	3.66162	24.5226	25.3861		3	6	6	9		11.1111	11.1111	25	25.7143
	39.8	7.8	63.8	X		17.4945	3.3534	26.7842	X		13	3	7	X		33.3333	7.89474	18.4211	X
	113.9	14.9	97.7	13.8		44.8779	6.56966	37.39	4.74716		15	3	5	5		62.5	12.5	26.3158	55.5556
	93	18.7	51.6	130.2		51.0148	9.27119	21.4821	54.2274		15	9	4	22		31.9149	16.6667	10.5263	59.4595
	127.4	37.2	83	57.2		53.8462	15.0182	39.656	23.9031		19	7	15	9		48.7179	13.2075	46.875	30
	83.2	4.9	64.8	265,3*		34.739	1.85325	29.9861	92,1*		14	3	12	2*		42.4242	20	34.2857	100*
	110	19.1	44.8	60.6		47.5162	9.13876	20.2166	24.928		26	6	6	14		49.0566	14.2857	15.3846	24.1379
	22.6	23.7	150,0*	46.2		10.1345	10.9166	60,8*	18.48		6	8	20*	5		14.6341	14.8148	39,2*	18.5185
	88	28.8	64.6	89.8		42.7184	11.2062	29.2308	41.0046		17	6	18	13		33.3333	24	35.2941	36.1111
	4.5					1.58284					1					25
	33.1					12.098					4					23.5294
	1.8					0.73141					2					11.7647
	0					0					0					0
	79.9					34.9825					15					42.8571
	1.3					0.594966					2					5.26316
	10.5					5.93556					5					13.1579
	25.3					12.1576					9					19.1489
	33.2					13.9028					7					21.2121
	27.8					14.3151					11					20.3704
N	20	10	9	8		20	10	9	8		20	10	9	8		20	10	9	8
mean	45.095	16.41	65.4667	72.7375		20.061	7.11021	28.4677	30.678		9.5	5.2	8.88889	11.5		26.895	13.9026	26.4476	35.9948
SEM	9.76046	3.61974	7.56048	14.6496		4.32991	1.51099	2.97918	6.08929		1.5753	0.81377	1.63677	2.01778		3.62742	1.76902	3.72615	5.22177
-0,95%	24.6661	8.22157	48.0322	38.0967		10.9984	3.69211	21.5977	16.2791		6.20285	3.35912	5.11449	6.72871		19.3028	9.90081	17.8551	23.6473
+0,95%	65.5239	24.5984	82.9012	107.378		29.1236	10.5283	35.3377	45.0769		12.7971	7.04088	12.6633	16.2713		34.4873	17.9044	35.0401	48.3423
F(1,43)		0.954308	12.2424	2.69045			1.2789	11.3345	2.54833			0.223154	2.53196	3.73678			0.169292	6.68193	7.24585
p		0.334089	0.00110016	0.108248			0.264371	0.00161177	0.117735			0.639036	0.118887	0.059829			0.682785	0.0132154	0.0100846

## Sheet: Table S7
Table S7 EPM exploration raw data and descriptive statistic after 21-day administration of haloperidol, risperidon, WAY-181187 and SB-742457, given alone and in combinations
Note: The data were evaluated using two-way analysis of variance (ANOVA), value*―outlier values excluded from statistical analysis, X - an animal terminated because of a significant deterioration of health or died during experiment
Abbreviations: veh―vehicle, halo―haloperidol, risp―risperidone, WAY―WAY-181187, SB―SB-742457, N―number of data included in the statistical analysis, SEM―number of data included in the statistical analysis standard error of the mean, -0,95%/+0,95%―lower/upper bound of 95% confidence interval
	total entries					total distance (cm)
	veh	halo	WAY	halo+WAY		veh	halo	WAY	halo+WAY
	30	22	44	46		4229	4357	4421	4259
	55	36	39	19		5423	4241	4503	4231
	44	27	36	13		4669	3655	5177	3969
	41	23	25	36		4743	3689	4145	4579
	28	44	49	29		4707	4657	5377	3567
	41	23	34	38		5587	3250	5034	5330
	16	46	30	17		4073	4674	4432	3985
	29	34	22	24		5163	4507	4271	4649
	38	9	40	44		5181	2381	5123	4553
	24	X	50	25		3235	X	4736	4119
	32					4421
	36					4602
	29					4383
	26					4321
	49					4894
	43					5601
	16*					2453*
	42					4318
	17					4096
N	18	9	10	10		18	9	10	10
mean	34.4444	29.3333	36.9	29.1		4647	3934.56	4721.9	4324.1
SEM	2.49735	3.92994	2.98682	3.62844		141.888	255.206	135.539	152.899
-0,95%	29.1755	20.2709	30.1433	20.8919		4347.64	3346.05	4415.29	3978.22
+0,95%	39.7134	38.3958	43.6567	37.3081		4946.36	4523.06	5028.51	4669.98
F(1,43)		3.90336	0.115634	0.1693			9.89615	1.73179	0.79482
p		0.0546294	0.735474	0.682778			0.00300334	0.195155	0.377608
	total entries					total distance (cm)
	veh	risp	WAY	risp+WAY		veh	risp	WAY	risp+WAY
	30	22	44	29		4229	3838	4421	3835
	55	54	39	32		5423	5119	4503	3858
	44	38	36	33		4669	4042	5177	4629
	41	24	25	13		4743	3704	4145	4733
	28	54	49	6*		4707	5055	5377	2309*
	41	53	34	33		5587	4274	5034	4199
	16	15	30	41		4073	4050	4432	4264
	29	42	22	36		5163	5110	4271	4603
	38	54	40	35		5181	5301	5123	3827
	4	25	50	34		2590	4207	4736	4772
	17					3060
	17					3776
	35					4760
	38					4447
	38					4627
	47					4593
	33					4695
	54					5112
	35					4760
N	19	10	10	9		19	10	10	9
mean	33.6842	38.1	36.9	31.7778		4536.58	4470	4721.9	4302.22
SEM	3.02818	4.89773	2.98682	2.58617		172.01	191.976	135.539	132.135
-0,95%	27.3222	27.0206	30.1433	25.8141		4175.2	4035.72	4415.29	3997.52
+0,95%	40.0462	49.1794	43.6567	37.7415		4897.96	4904.28	5028.51	4606.93
F(1,44)		0.00917508	0.177416	1.67257			1.74973	0.00227751	0.92264
p		0.924125	0.675654	0.202664			0.192745	0.962153	0.342032
	total entries					total distance (cm)
	veh	halo	SB	halo+SB		veh	halo	SB	halo+SB
	30	22	27	41		4229	4357	3812	4841
	55	36	24	58		5423	4241	4191	6053
	44	27	38	21		4669	3655	5189	4108
	41	23	19	42		4743	3689	3975	4395
	28	44	38	40		4707	4657	4137	4982
	41	23	32	30		5587	3250	5053	3977
	16	46	35	23		4073	4674	4544	4297
	29	34	39	47		5163	4507	4031	4578
	38	9	51*	34		5181	2381	6972*	4452
	24	X	51	20		3235	X	5125	4019
	32					4421
	36					4602
	29					4383
	26					4321
	49					4894
	43					5601
	16*					2453*
	42					4318
	17					4096
N	18	9	9	10		18	9	9	10
mean	34.4444	29.3333	33.6667	35.6		4647	3934.56	4450.78	4570.2
SEM	2.49735	3.92994	3.17105	3.90214		141.888	255.206	180.565	195.229
-0,95%	29.1755	20.2709	26.3542	26.7728		4347.64	3346.05	4034.39	4128.56
+0,95%	39.7134	38.3958	40.9791	44.4272		4946.36	4523.06	4867.16	5011.84
F(1,42)		0.219496	0.654861	1.07863			2.35139	1.29106	4.6269
p		0.641846	0.422941	0.304946			0.13267	0.262294	0.0372738
	total entries					total distance (cm)
	veh	risp	SB	risp+SB		veh	risp	SB	risp+SB
	21	22	27	39		3297	3838	3812	3377
	27	54	24	35		3747	5119	4191	6151
	39	38	38	X		3946	4042	5189	X
	24	24	19	37		4333	3704	3975	3269
	47	54	38	30		4574	5055	4137	4269
	39	53	32	58		4722	4274	5053	5740
	33	15	35	2*		4187	4050	4544	327*
	47	42	39	27		5533	5110	4031	3690
	41	54	51*	36		4806	5301	6972*	2890
	51	25	51	36		5233	4207	5125	4475
	4					2590
	17					3060
	17					3776
	12					3468
	35					5304
	38					4319
	38					4856
	47					4674
	33					4624
	54					5129
N	20	10	9	8		20	10	9	8
mean	33.2	38.1	33.6667	37.25		4308.9	4470	4450.78	4232.62
SEM	3.07674	4.89773	3.17105	3.2719		795.629	607.082	541.695	1181.41
-0,95%	26.7603	27.0206	26.3542	29.5132		177.908	191.976	180.565	417.693
+0,95%	39.6397	49.1794	40.9791	44.9868		3936.53	4035.72	4034.39	3244.94
F(1,43)		1.13209	0.00231154	0.0272709		4681.27	4904.28	4867.16	5220.31
p		0.293269	0.961876	0.869609			0.909066	0.848405	0.449198

## Sheet: Table S8
Table S8 Vogel conflict drinking test raw data and descriptive statistic after single administration of haloperidol, risperidon, WAY-181187 and SB-742457, given alone and in combinations
Note: The data were evaluated using two-way analysis of variance (ANOVA), value*―outlier values excluded from statistical analysis
Abbreviations: veh―vehicle, halo―haloperidol, risp―risperidone, WAY―WAY-181187, SB―SB-742457, N―number of data included in the statistical analysis, SEM―number of data included in the statistical analysis standard error of the mean, -0,95%/+0,95%―lower/upper bound of 95% confidence interval
	number of shocks accepted					number of licks						number of shocks accepted					number of licks
	veh	halo	WAY	halo+WAY		veh	halo	WAY	halo+WAY			veh	halo	SB	halo+SB		veh	halo	SB	halo+SB
	3	9	4	6		78	180	80	137			3	9	6	7		78	180	138	141
	2	12	6	7		64	270	125	145			2	12	4	4		64	270	82	93
	16	8	5	4		322	163	100	101			16*	8	5	2		322*	163	118	50
	6	11	3	7		129	227	70	156			6	11	6	8		129	227	136	178
	3	9	7	9		73	194	149	199			3	9	6	32*		73	194	127	641*
	8	8	3	9		175	175	74	189			8	8	8	12		175	175	173	247
	5	5	8	5		106	105	163	103			5	5	5	6		106	105	113	139
	3	4	14*	5		77	92	286*	111				4	4	6			92	93	150
	4					80
	9					195
	2					53
	7					143
	9					192
	5					259
	24*					489*
N	14	8	7	8		14	8	7	8		N	6	8	8	7		6	8	8	7
mean	6.13333	8.25	5.14286	6.5		137.2	175.75	108.714	142.625		mean	4.5	8.25	5.5	6.42857		104.167	175.75	122.5	142.571
SEM	0.960489	0.95898	0.737711	0.654654		20.1211	20.7207	14.1753	13.261		SEM	0.921954	0.95898	0.46291	1.19238		17.2306	20.7207	10.0125	23.532
-0,95%	4.07329	5.98237	3.33774	4.95199		94.0445	126.753	74.0286	111.268		-0,95%	2.13004	5.98237	4.40539	3.51092		59.8739	126.753	98.8242	84.9907
+0,95%	8.19338	10.5176	6.94797	8.04801		180.355	224.747	143.4	173.982		+0,95%	6.86996	10.5176	6.59461	9.34622		148.459	224.747	146.176	200.152
F(1,33)		3.05679	1.90242	0.146129			3.05051	2.20536	0.0125046		F(1,25)		6.57651	0.202725	2.3917			6.07139	0.159277	1.91776
p		0.0894257	0.176814	0.704642			0.0897414	0.146745	0.911621		p		0.0167238	0.65641	0.134547			0.0209655	0.693212	0.17834
	number of shocks accepted					number of licks						number of shocks accepted					number of licks
	veh	risp	WAY	risp+WAY		veh	risp	WAY	risp+WAY			veh	risp	SB	risp+SB		veh	risp	SB	risp+SB
	7	23*	4	3		160	489*	80	74			3	23*	6	7		78	489*	138	156
	4	3	6	11		91	72	125	239			2	3	4	3		64	72	82	77
	6	3	5	17		134	79	100	353			16*	3	5	4		322*	79	118	94
	4	2	3	29		89	54	70	585			6	2	6	4		129	54	136	83
	9	4	7	7		196	86	149	154			3	4	6	4		73	86	127	92
	4	0	3	24		83	2	74	482			8	0	8	4		175	2	173	88
	4	6	8	11		99	132	163	245			5	6	5	6		106	132	113	126
	3	11	14*	31		77	221	286*	691			7	11	4	6		158	221	93	136
	4					80						4					91
	9					195						6					211
	2					53						4					89
	7					143						9					196
	9					192						4					83
	5					113						4					99
	24*					489*
N	14	7	7	8		14	7	7	8		N	13	7	8	8		13	7	8	8
mean	5.5	4.14286	5.14286	16.625		121.786	92.2857	108.714	352.875		mean	5	4.14286	5.5	4.75		119.385	92.2857	122.5	106.5
SEM	0.626783	1.33503	0.737711	3.67393		12.9378	25.9988	14.1753	76.3931		SEM	0.57735	1.33503	0.46291	0.49099		13.7559	25.9988	10.0125	10.205
-0,95%	4.14592	0.876149	3.33774	7.93753		93.8353	28.6689	74.0286	172.234		-0,95%	3.74206	0.876149	4.40539	3.58899		89.4131	28.6689	98.8242	82.3689
+0,95%	6.85408	7.40957	6.94797	25.3125		149.736	155.903	143.4	533.516		+0,95%	6.25794	7.40957	6.59461	5.91101		149.356	155.903	146.176	130.631
F(1,32)		7.35497	10.5476	11.8269			7.76012	10.3175	12.6121		F(1,32)		1.15479	0.548024	0.00513238			1.82437	0.294959	0.120988
p		0.0106697	0.00273179	0.00164159			0.00890206	0.00299989	0.00121171		p		0.290586	0.464523	0.943334			0.186269	0.590824	0.730244

## Sheet: Table S9
Table S9 Vogel conflict drinking test raw data and descriptive statistic after 21-day administration of haloperidol, risperidon, WAY-181187 and SB-742457, given alone and in combinations
Note: The data were evaluated using two-way analysis of variance (ANOVA), value*―outlier values excluded from statistical analysis, X - an animal terminated because of a significant deterioration of health or died during experiment
Abbreviations: veh―vehicle, halo―haloperidol, risp―risperidone, WAY―WAY-181187, SB―SB-742457, N―number of data included in the statistical analysis, SEM―number of data included in the statistical analysis standard error of the mean, -0,95%/+0,95%―lower/upper bound of 95% confidence interval
	number of shocks accepted					number of licks						number of shocks accepted					number of licks
	veh	halo	WAY	halo+WAY		veh	halo	WAY	halo+WAY			veh	halo	SB	halo+SB		veh	halo	SB	halo+SB
	5	3	6	8		112	66	125	173			3	3	3	2		60	66	62	41
	12*	4	4	3		242*	90	86	76			2	4	7*	2		51	90	164*	46
	7	13*	3	4		146	279*	61	99			3	13*	4	3		72	279*	66	73
	5	3	5	8		112	60	112	165			3	3	3	7		77	60	68	166
	4	4	4	5		96	94	88	105			4	4	4	6		84	94	89	123
	2	3	4	7		59	60	89	174			5	3	3	3		103	60	77	79
	4	3	5	5		96	77	119	124			6	3	4	2		120	77	89	43
	6	5	4	5		123	104	94	110			4	5	4	7		80	104	84	145
	4	3	8	3		90	76	160	65			8	3	5	6		176	76	102	125
	5	4	5	X		107	91	106	X			8	4	4	8		162	91	97	163
												5					112
												12*					242*
												7					146
												5					112
												4					96
												2					59
												4					96
												6					123
												4					90
												5					107
N	9	9	10	9		9	9	10	9		N	19	9	9	10		19	9	9	10
mean	4.66667	3.55556	4.8	5.33333		104.556	79.7778	104	121.222		mean	4.63158	3.55556	3.77778	4.6		101.368	79.7778	81.5556	100.4
SEM	0.471405	0.242161	0.442217	0.645497		8.00019	5.28829	8.57904	13.6827		SEM	0.40617	0.242161	0.222222	0.763035		7.79084	5.28829	4.71732	15.7475
-0,95%	3.57961	2.99713	3.79964	3.84481		86.1071	67.583	84.5929	89.6699		-0,95%	3.77825	2.99713	3.26533	2.8739		85.0005	67.583	70.6774	64.7768
+0,95%	5.75373	4.11398	5.80036	6.82185		123.004	91.9726	123.407	152.775		+0,95%	5.48491	4.11398	4.29022	6.3261		117.736	91.9726	92.4337	136.023
F(1,33)		0.374836	4.10102	3.03639			0.162668	4.76408	5.02652		F(1,43)		0.0633723	0.0357565	3.54501			0.0185277	0.00160931	4.01675
p		0.544576	0.0510093	0.0907301			0.689314	0.0362793	0.0318026		p		0.802442	0.850909	0.0665015			0.892364	0.968186	0.0513748
	number of shocks accepted					number of licks						number of shocks accepted					number of licks
	veh	risp	WAY	risp+WAY		veh	risp	WAY	risp+WAY			veh	risp	SB	risp+SB		veh	risp	SB	risp+SB
	2	4	6	3		54	82	125	77			2	4	3	3		54	82	62	85
	4	4	4	2		80	89	86	45			4	4	7*	5		80	89	164*	113
	4	3	3	5		83	70	61	108			4	3	4	5		83	70	66	111		9	104.556	8.00019	86.1071	123.004
	4	5	5	6		86	114	112	135			4	5	3	6		86	114	68	121		9	79.7778	5.28829	67.583	91.9726
	3	6	4	5		69	122	88	115			3	6	4	3		69	122	89	64		10	104	8.57904	84.5929	123.407
	5	6	4	14		85	123	89	286			5	6	3	3		85	123	77	64		9	121.222	13.6827	89.6699	152.775
	7	4	5	20*		166	85	119	414*			7	4	4	8		166	85	89	169
	2	11*	4	4		60	220*	94	92			2	11*	4	8		60	220*	84	183
	5	6	8	3		109	143	160	81			5	6	5	4		109	143	102	93
	5	3	5	2		109	80	106	46			5	3	4	37*		109	80	97	778*
	5					112						3					60
	12*					242*						2					51
	7					146						3					72
	5					112						3					77
	4					96						4					84
	2					59						5					103
	4					96						6					120
	6					123						4					80
	4					90						8					176
	5					107						8					162
N	19	9	10	9		19	9	10	9		N	20	9	9	9		20	9	9	9
mean	4.36842	4.55556	4.8	4.88889		96.9474	100.889	104	109.444		mean	4.35	4.55556	3.77778	5		94.3	100.889	81.5556	111.444
SEM	0.360397	0.412011	0.442217	1.22977		6.46786	8.35072	8.57904	24.2104		SEM	0.405716	0.412011	0.222222	0.666667		8.21651	8.35072	4.71732	13.9783
-0,95%	3.61125	3.60546	3.79964	2.05302		83.3589	81.6321	84.5929	53.6152		-0,95%	3.50083	3.60546	3.26533	3.46266		77.1026	81.6321	70.6774	79.2105
+0,95%	5.12559	5.50565	5.80036	7.72475		110.536	120.146	123.407	165.274		+0,95%	5.19917	5.50565	4.29022	6.53734		111.497	120.146	92.4337	143.678
F(1,43)		0.0477237	0.366493	0.006046			0.148277	0.410034	0.0038018		F(1,43)		2.07266	0.0166004	1.05091			3.22063	0.0115966	1.314
p		0.828106	0.548104	0.938383			0.702086	0.52535	0.95112		p		0.157201	0.898083	0.311031			0.0797475	0.914744	0.258011

## Sheet: Table S10
Table S10 Hot plate test and water consumption raw data and descriptive statistic after single co-administration of risperidon and WAY-181187
Note: The data were evaluated using one-way analysis of variance (ANOVA), value*―outlier values excluded from statistical analysis
Abbreviations: veh―vehicle,risp―risperidone, WAY―WAY-181187, N―number of data included in the statistical analysis, SEM―number of data included in the statistical analysis standard error of the mean, -0,95%/+0,95%―lower/upper bound of 95% confidence interval
	hot plate test reaction time (s)				water consumption (g)
	veh	risp+WAY			veh	risp+WAY
	24,9*	13.9			6	6.6
	8.7	18.1			4.8	4.8
	6.5	7.7			5	5.1
	7	7.7			4.9	5.7
	7.5	21.8			4.6	2.9
	8.9	9.7			5.4	5.9
N	5	6		N	6	6
mean	7.72	13.15		mean	5.11667	5.16667
SEM	0.469468	2.38883		SEM	0.20723	0.521323
-0,95%	6.41655	7.00932		-0,95%	4.58396	3.82656
+0,95%	9.02345	19.2907		+0,95%	5.64937	6.50677
F(1,9)		4.12134		F(1,10)		0.00794351
p		0.0729216		p		0.930741

[truncated: 1 more sheets: Table S11]
